# Supplementary material for: Systematic review of changed smoking behaviour, smoking cessation and psychological states of smokers according to cigarette type during the COVID-19 pandemic
Source: HighWire-hosted journal article supplement (doi:10.1136/bmjopen-2021-055179), 2022-06-01
Supplement: bmjopen-2021-055179supp001_data_supplement.pdf [file bmjopen-2021-055179supp001_data_supplement.pdf]

|                                                                                                                                                                                                                                                                                                                                                                                                                                                                                                                                                                                                                                                                                                                                                                                                                                                                                                                                                                                                                                                                                                                                                                                                                                                                                                                                                                                                                                                                                                                                                                                                                                                                      |
|----------------------------------------------------------------------------------------------------------------------------------------------------------------------------------------------------------------------------------------------------------------------------------------------------------------------------------------------------------------------------------------------------------------------------------------------------------------------------------------------------------------------------------------------------------------------------------------------------------------------------------------------------------------------------------------------------------------------------------------------------------------------------------------------------------------------------------------------------------------------------------------------------------------------------------------------------------------------------------------------------------------------------------------------------------------------------------------------------------------------------------------------------------------------------------------------------------------------------------------------------------------------------------------------------------------------------------------------------------------------------------------------------------------------------------------------------------------------------------------------------------------------------------------------------------------------------------------------------------------------------------------------------------------------|
| Diseases[Title/Abstract])) OR (Disease, 2019-nCoV[Title/Abstract])) OR (COVID19[Title/Abstract])) OR (Coronavirus Disease 2019[Title/Abstract])) OR (Disease 2019, Coronavirus[Title/Abstract])) OR (SARS Coronavirus 2 Infection[Title/Abstract])) OR (Infection, SARS-CoV-2[Title/Abstract])) OR (SARS-CoV-2 Infection[Title/Abstract])) OR (SARS CoV 2 Infection[Title/Abstract])) OR (SARS-CoV-2 Infections[Title/Abstract])) OR (COVID-19 Pandemic[Title/Abstract])) OR (COVID 19 Pandemic[Title/Abstract])) OR (COVID-19 Pandemics[Title/Abstract])) OR (Pandemic, COVID-19[Title/Abstract])) OR ("COVID-19"[Mesh])                                                                                                                                                                                                                                                                                                                                                                                                                                                                                                                                                                                                                                                                                                                                                                                                                                                                                                                                                                                                                                            |
| Tobacco, Tobacco Products, Tobacco Use                                                                                                                                                                                                                                                                                                                                                                                                                                                                                                                                                                                                                                                                                                                                                                                                                                                                                                                                                                                                                                                                                                                                                                                                                                                                                                                                                                                                                                                                                                                                                                                                                               |
| (((((Tobacco Uses[Title/Abstract]) OR (Tobacco Consumption[Title/Abstract])) OR (Consumption, Tobacco[Title/Abstract])) OR ("Tobacco Use"[Mesh])) OR (((((((((((((((Tobaccos[Title/Abstract]) OR (Nicotiana[Title/Abstract])) OR (Nicotianas[Title/Abstract])) OR (Nicotiana tabacum[Title/Abstract])) OR (Nicotiana tabacums[Title/Abstract])) OR (tabacum, Nicotiana[Title/Abstract])) OR ("Tobacco"[Mesh])) OR ("Smoking"[Mesh])) OR (Smoking Behaviors[Title/Abstract])) OR (Behavior, Smoking[Title/Abstract])) OR (Behaviors, Smoking[Title/Abstract])) OR (Smoking Behavior[Title/Abstract])) OR (Smoking Habit[Title/Abstract])) OR (Habit, Smoking[Title/Abstract])) OR (Habits, Smoking[Title/Abstract])) OR (Smoking Habits[Title/Abstract])) OR (((((((((((((((((((Product, Tobacco[Title/Abstract]) OR (Products, Tobacco[Title/Abstract])) OR (Tobacco Product[Title/Abstract])) OR (Cigarillos[Title/Abstract])) OR (Cigarillo[Title/Abstract])) OR (Pipe Tobacco[Title/Abstract])) OR (Pipe Tobaccos[Title/Abstract])) OR (Tobacco, Pipe[Title/Abstract])) OR (Cigars[Title/Abstract])) OR (Tobaccos, Pipe[Title/Abstract])) OR (Cigar[Title/Abstract])) OR (Kreteks[Title/Abstract])) OR (Kretek[Title/Abstract])) OR (Kreteks Tobacco[Title/Abstract])) OR (Kreteks Tobaccos[Title/Abstract])) OR (Tobacco, Kreteks[Title/Abstract])) OR (Tobaccos, Kreteks[Title/Abstract])) OR (Bidis[Title/Abstract])) OR (Bidi[Title/Abstract])) OR (Bidis Tobacco[Title/Abstract])) OR (Bidis Tobaccos[Title/Abstract])) OR (Tobacco, Bidis[Title/Abstract])) OR (Cigarettes[Title/Abstract])) OR (Cigarette[Title/Abstract])) OR ("Tobacco Products"[Mesh])) |
| Psychology                                                                                                                                                                                                                                                                                                                                                                                                                                                                                                                                                                                                                                                                                                                                                                                                                                                                                                                                                                                                                                                                                                                                                                                                                                                                                                                                                                                                                                                                                                                                                                                                                                                           |
| ("Psychology"[Mesh]) OR ("Psychology/diagnosis"[Mesh] OR "Psychology/psychology"[Mesh]) OR (((((((((((((((Side Effects, Psychological[Title/Abstract]) OR (Psychological Side Effect[Title/Abstract])) OR (Side Effect, Psychological[Title/Abstract])) OR (Psychological Side Effects[Title/Abstract])) OR (Psychosocial Factors[Title/Abstract])) OR (Factor, Psychosocial[Title/Abstract])) OR (Factors, Psychosocial[Title/Abstract])) OR (Psychosocial Factor[Title/Abstract])) OR (Psychological Factors[Title/Abstract])) OR                                                                                                                                                                                                                                                                                                                                                                                                                                                                                                                                                                                                                                                                                                                                                                                                                                                                                                                                                                                                                                                                                                                                  |

|                                                                                                                                                                                                                                                                                                                                                                                                                                                                                                                                                                                                                                                                                                                                           |
|-------------------------------------------------------------------------------------------------------------------------------------------------------------------------------------------------------------------------------------------------------------------------------------------------------------------------------------------------------------------------------------------------------------------------------------------------------------------------------------------------------------------------------------------------------------------------------------------------------------------------------------------------------------------------------------------------------------------------------------------|
| (Factor, Psychological[Title/Abstract])) OR (Psychological Factor[Title/Abstract])) OR (Factors, Psychological[Title/Abstract])) OR (Psychologist[Title/Abstract])) OR (Psychologists[Title/Abstract]))                                                                                                                                                                                                                                                                                                                                                                                                                                                                                                                                   |
| Anxiety                                                                                                                                                                                                                                                                                                                                                                                                                                                                                                                                                                                                                                                                                                                                   |
| (((((Angst[Title/Abstract]) OR (Nervousness[Title/Abstract])) OR (Hypervigilance[Title/Abstract])) OR (Anxiousness[Title/Abstract])) OR (Social Anxiety[Title/Abstract])) OR (Anxieties, Social[Title/Abstract])) OR (Anxiety, Social[Title/Abstract])) OR (Social Anxieties[Title/Abstract])) OR ("Anxiety"[Mesh]) OR ("Anxiety/analysis"[Mesh]) OR ("Anxiety/diagnosis"[Mesh]) OR ("Anxiety/psychology"[Mesh]))                                                                                                                                                                                                                                                                                                                         |
| Stress, Psychological                                                                                                                                                                                                                                                                                                                                                                                                                                                                                                                                                                                                                                                                                                                     |
| (((((Psychological Stresses[Title/Abstract]) OR (Stresses, Psychological[Title/Abstract])) OR (Life Stress[Title/Abstract])) OR (Life Stresses[Title/Abstract])) OR (Stress, Life[Title/Abstract])) OR (Stresses, Life[Title/Abstract])) OR (Stress, Psychologic[Title/Abstract])) OR (Psychologic Stress[Title/Abstract])) OR (Stressor, Psychological[Title/Abstract])) OR (Psychological Stressor[Title/Abstract])) OR (Psychological Stressors[Title/Abstract])) OR (Stressors, Psychological[Title/Abstract])) OR (Psychological Stress[Title/Abstract])) OR ("Stress, Psychological"[Mesh]) OR ("Stress, Psychological/analysis"[Mesh]) OR ("Stress, Psychological/diagnosis"[Mesh]) OR ("Stress, Psychological/psychology"[Mesh])) |
| Depression                                                                                                                                                                                                                                                                                                                                                                                                                                                                                                                                                                                                                                                                                                                                |
| ((("Depression"[Mesh]) OR ("Depression/analysis"[Mesh]) OR ("Depression/diagnosis"[Mesh]) OR ("Depression/psychology"[Mesh])) OR (((Depressions[Title/Abstract]) OR (Depressive Symptoms[Title/Abstract])) OR (Depressive Symptom[Title/Abstract])) OR (Symptom, Depressive[Title/Abstract])) OR (Symptoms, Depressive[Title/Abstract])) OR (Emotional Depression[Title/Abstract])) OR (Depression, Emotional[Title/Abstract])) OR (Depressions, Emotional[Title/Abstract])) OR (Emotional Depressions[Title/Abstract]))                                                                                                                                                                                                                  |

**Table 2 Science Direct search terms**

|                                                                                                                                                |
|------------------------------------------------------------------------------------------------------------------------------------------------|
| Query                                                                                                                                          |
| COVID AND (e-cigarette OR "electronic cigarette" OR "electronic nicotine delivery" OR "vaping" OR "heat not burn" OR "heated tobacco product") |
| COVID AND (tobaccos OR cigarette OR kretek OR bidis OR "pipe tobacco" OR cigarillos)                                                           |
